# Supplementary material for: Harvesting greenish blue luminescence in gold(i) complexes and their application as promising bioactive molecules and cellular bioimaging agents
Source: Royal Society of Chemistry journal article supplement (doi:10.1039/d0nj01339k), 2020-01-01
Supplement: d0nj01339k1.pdf [file d0nj01339k1.pdf]

## Supporting information for:

### **Harvesting greenish blue luminescence in Gold(I) complexes and their application as promising bioactive molecules and cellular bioimaging agents.**

Lis R. V. Favarin<sup>[a]</sup>, G. B. Laranjeira<sup>[a]</sup>, Cristiane F. A. Teixeira<sup>[a]</sup>, Heveline Silva<sup>[b]</sup>, A. C. Micheletti<sup>[a]</sup>, Lucas Pizzuti<sup>[a]</sup>, Amilcar Machulek Júnior<sup>[a]</sup>, Anderson R. L. Caires<sup>[a]</sup>, Victor M. Deflon<sup>[c]</sup>, Rafaela B. P. Pesci<sup>[e]</sup>, C. N. Lima Rocha<sup>[d]</sup>, J. R. Correa<sup>[d]</sup>, L. M. C. Pinto<sup>[a]</sup>, and Gleison Antônio Casagrande\*<sup>[a]</sup>

[a] Grupo de Pesquisa em Síntese e Caracterização Molecular de Mato Grosso do Sul, Instituto de Química, Universidade Federal de Mato Grosso do Sul (Laboratório 2); Av. Senador Filinto Muller, 1555, Campo Grande, MS 79074-460, Brazil.

[b] Departamento de Química, ICEX, Universidade Federal de Minas Gerais; Belo Horizonte, MG 31270-901, Brazil.

[c] Instituto de Química de São Carlos, Universidade de São Paulo; Av. Trabalhador São-Carlense, 400, São Carlos, SP 13566-590, Brazil.

[d] Laboratório de Microscopia e Microanálises, Grupo Quimioterápicos e Sondas Fluorescentes, Instituto de Ciências Biológicas, Universidade de Brasília; Av. L3 Norte, s.n., Campus Darcy Ribeiro, Brasília, DF 70910-900, Brazil.

[e] Departamento de Química, Universidade Federal da Paraíba – UFPB, 58051-900 João Pessoa – PB, Brazil.

---

\*Corresponding author. Tel. +55 67 3345 3595; fax +55 67 3345 7190; e-mail addresses: [gleisoncasag@gmail.com](mailto:gleisoncasag@gmail.com), [gleison.casagrande@ufms.br](mailto:gleison.casagrande@ufms.br)

Table S1. Crystal data and structure refinement for complexes **1**, **2** and **3**

| Compound                                                     | <b>1</b>                                                                          | <b>2</b>                                                                          | <b>3</b>                                                                                       |
|--------------------------------------------------------------|-----------------------------------------------------------------------------------|-----------------------------------------------------------------------------------|------------------------------------------------------------------------------------------------|
| Empirical formula                                            | C <sub>36</sub> H <sub>36</sub> AuF <sub>6</sub> N <sub>3</sub> OP <sub>2</sub> S | C <sub>35</sub> H <sub>34</sub> AuF <sub>6</sub> N <sub>3</sub> OP <sub>2</sub> S | C <sub>36</sub> H <sub>36</sub> AuO <sub>2</sub> N <sub>3</sub> SP <sub>2</sub> F <sub>6</sub> |
| Formula weight                                               | 931.64                                                                            | 917.62                                                                            | 947.70                                                                                         |
| Temperature (K)                                              | 296(2)                                                                            | 296(2)                                                                            | 296(2)                                                                                         |
| Radiation, $\lambda$ (Å)                                     | 0.71073                                                                           | 0.71073                                                                           | 0.71073                                                                                        |
| Crystal system                                               | Monoclinic ( <i>P</i> 2 <sub>1</sub> / <i>n</i> )                                 | Monoclinic ( <i>P</i> 2 <sub>1</sub> / <i>n</i> )                                 | Monoclinic ( <i>P</i> 2 <sub>1</sub> / <i>n</i> )                                              |
| Unit cell dimensions                                         |                                                                                   |                                                                                   |                                                                                                |
| <i>a</i> (Å)                                                 | 15.6260(6)                                                                        | 15.5446(3)                                                                        | 15.730(4)                                                                                      |
| <i>b</i> (Å)                                                 | 15.1781(6)                                                                        | 14.8994(3)                                                                        | 14.896(5)                                                                                      |
| <i>c</i> (Å)                                                 | 16.3393(6)                                                                        | 16.1594(4)                                                                        | 16.543(5)                                                                                      |
| $\alpha$ (°)                                                 | 90.000(0)                                                                         | 90.000(0)                                                                         | 90.000(0)                                                                                      |
| $\beta$ (°)                                                  | 104.658(2)                                                                        | 105.9130(10)                                                                      | 105.515(10)                                                                                    |
| $\gamma$ (°)                                                 | 90.000(0)                                                                         | 90.000(0)                                                                         | 90.000(0)                                                                                      |
| Volume (Å <sup>3</sup> )                                     | 3749.1(2)                                                                         | 3599.18(13)                                                                       | 3734.8(19)                                                                                     |
| <i>Z</i> / density calculated (g cm <sup>-3</sup> )          | 4/1.651                                                                           | 4/1.693                                                                           | 4/1.402                                                                                        |
| Absorption coefficient (mm <sup>-1</sup> )                   | 4.128                                                                             | 4.298                                                                             | 4.087                                                                                          |
| <i>F</i> (000)                                               | 1840                                                                              | 1808                                                                              | 1528                                                                                           |
| Crystal size (mm)                                            | 0.41 × 0.18 × 0.18                                                                | 0.82 × 0.56 × 0.28                                                                | 0.22 × 0.22 × 0.14                                                                             |
| Range for data collection, $\theta$ (°)                      | 1.86 to 26.42                                                                     | 1.61 to 26.41                                                                     | 2.495 to 30.176                                                                                |
| Index ranges                                                 | -19 ≤ <i>h</i> ≤ 19<br>-18 ≤ <i>k</i> ≤ 18<br>-20 ≤ <i>l</i> ≤ 20                 | -16 ≤ <i>h</i> ≤ 19<br>-15 ≤ <i>k</i> ≤ 18<br>-16 ≤ <i>l</i> ≤ 20                 | -22 ≤ <i>h</i> ≤ 22<br>-20 ≤ <i>k</i> ≤ 20<br>-22 ≤ <i>l</i> ≤ 23                              |
| Reflections collected                                        | 28644                                                                             | 27388                                                                             | 53312                                                                                          |
| Independent reflections                                      | 7690[R(int) = 0.0244]                                                             | 7382[R(int) = 0.0364]                                                             | 10998[R(int) = 0.0408]                                                                         |
| Completeness to $\theta_{\max}$                              | 99.7%                                                                             | 99.9%                                                                             | 99.7%                                                                                          |
| Absorption correction                                        | Multi-scan                                                                        | Multi-scan                                                                        | Multi-scan                                                                                     |
| Data/restraints/parameters                                   | 7690 / 0 / 518                                                                    | 7382 / 36 / 444                                                                   | 10998 / 0 / 460                                                                                |
| Goodness-of-fit, <i>F</i> <sup>2</sup>                       | 1.019                                                                             | 1.027                                                                             | 1.032                                                                                          |
| Final <i>R</i> indices ( <i>I</i> > 2 $\sigma$ ( <i>I</i> )) | <i>R</i> <sub>1</sub> = 0.0254<br>w <i>R</i> <sub>2</sub> = 0.0670                | <i>R</i> <sub>1</sub> = 0.0302<br>w <i>R</i> <sub>2</sub> = 0.0720                | <i>R</i> <sub>1</sub> = 0.0405<br>w <i>R</i> <sub>2</sub> = 0.0980                             |
| <i>R</i> indices (all data)                                  | <i>R</i> <sub>1</sub> = 0.0333<br>w <i>R</i> <sub>2</sub> = 0.0718                | <i>R</i> <sub>1</sub> = 0.0391<br>w <i>R</i> <sub>2</sub> = 0.0756                | <i>R</i> <sub>1</sub> = 0.0732<br>w <i>R</i> <sub>2</sub> = 0.1122                             |
| Largest peak-and-hole difference (e Å <sup>-3</sup> )        | 1.192 and -0.694                                                                  | 0.921 and -0.875                                                                  | 1.021 and -0.644                                                                               |

\**R*<sub>1</sub> =  $|F_0 - F_c| / |F_0|$ ; w*R*<sub>2</sub> =  $[w(F_0^2 - F_c^2)^2 / (wF_0^2)]^{-1/2}$

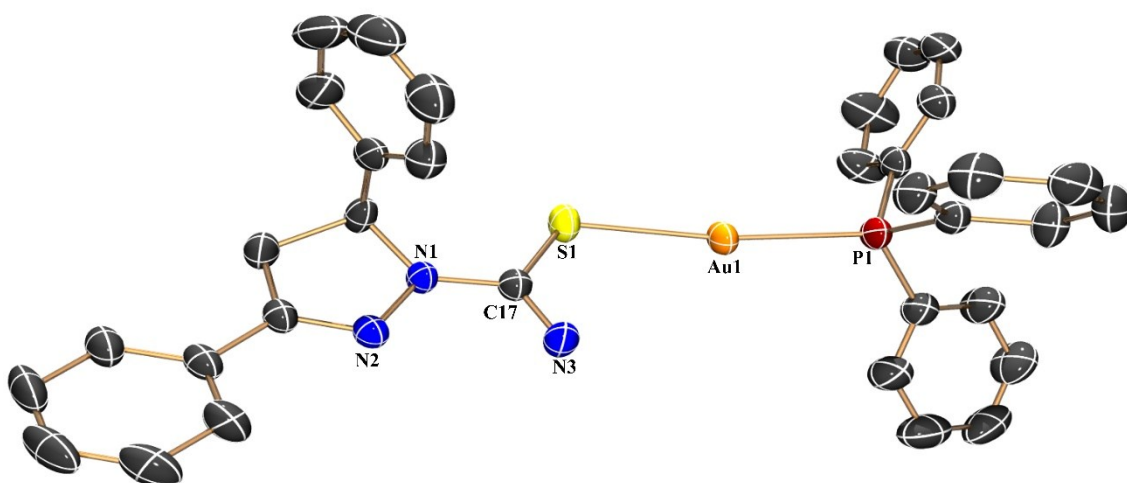

Figure S1. Crystalline structure of **2**. Hydrogen atoms,  $\text{PF}_6$  anion, and methanol solvate omitted for clarity. Thermal ellipsoids drawn at a 50% probability level.

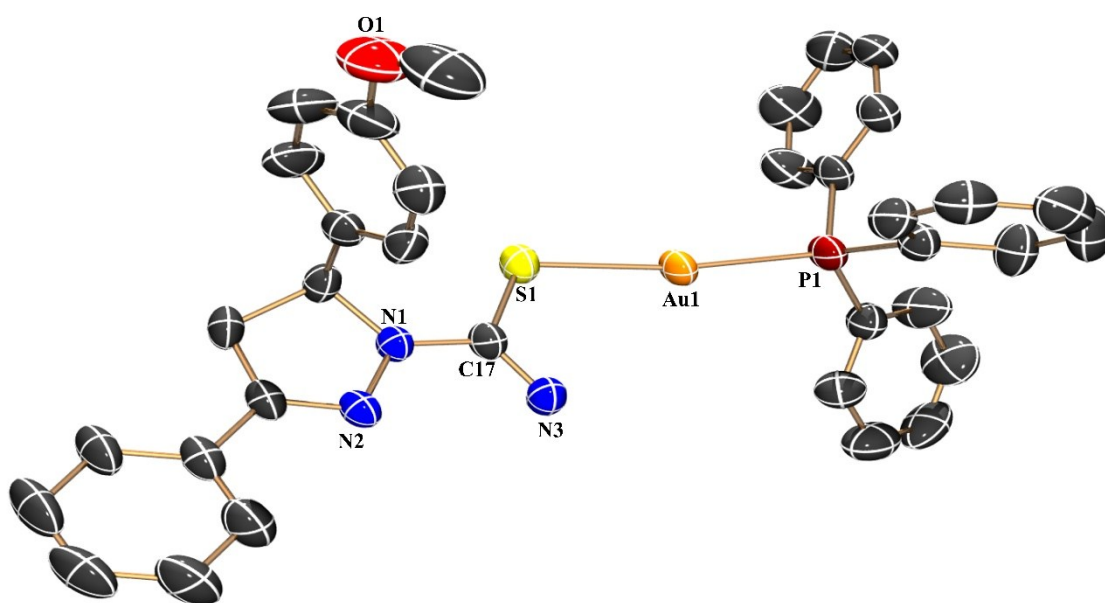

Figure S2. Crystalline structure of **3**. Hydrogen atoms,  $\text{PF}_6$  anion, and methanol solvate omitted for clarity. Thermal ellipsoids drawn at a 50% probability level.

Table S2. Selected bond distances (Å) and bond angles (°) for complexes **1**, **2** and **3**.

|                 | <b>Complex 1</b> | <b>Complex 2</b> | <b>Complex 3</b> |
|-----------------|------------------|------------------|------------------|
| Distances (Å)   |                  |                  |                  |
| P(1)-Au(1)      | 2.2729(8)        | 2.2680(9)        | 2.2600(12)       |
| S(1)-Au(1)      | 2.3053(8)        | 2.3018(9)        | 2.2950(12)       |
| C(17)-S(1)      | 1.724(3)         | 1.719(4)         | 1.721(4)         |
| C(17)-(N1)      | 1.331(4)         | 1.329(4)         | 1.326(5)         |
| C(17)-N(3)      | 1.309(4)         | 1.314(5)         | 1.303(5)         |
| N(1)-N(2)       | 1.410(3)         | 1.409(4)         | 1.406(4)         |
| Angles (°)      |                  |                  |                  |
| P(1)-Au(1)-S(1) | 169.83(3)        | 169.63(4)        | 170.64(4)        |

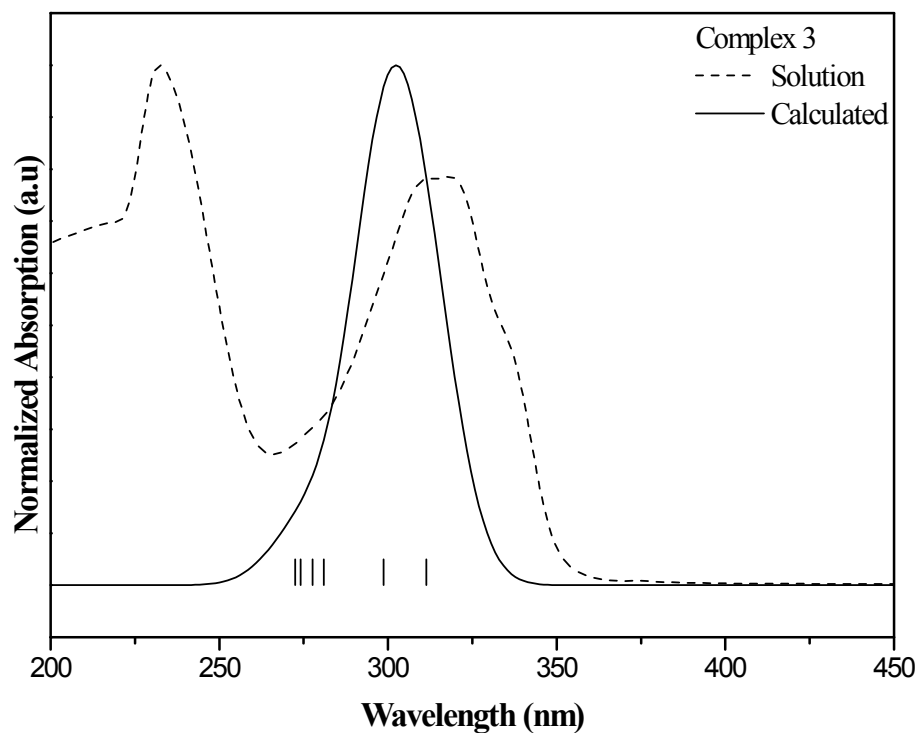

Figure S3. Experimental (solid line) and calculated (dashed line) absorption spectra of complex **3**.

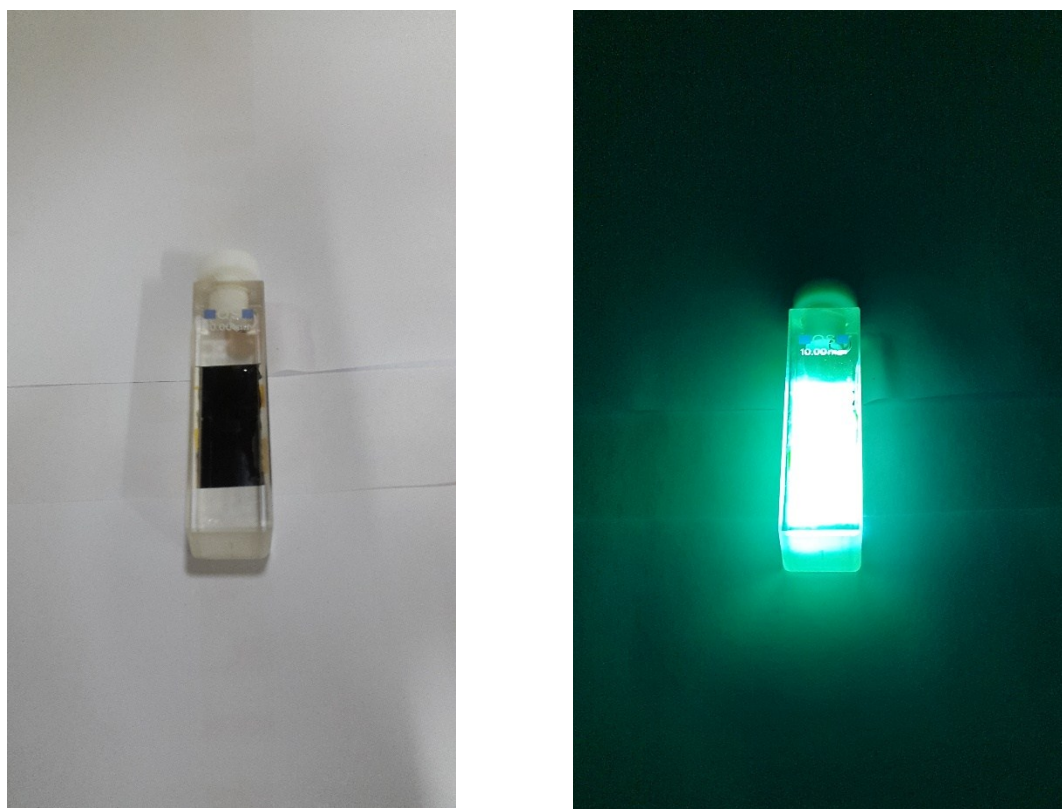

Figure S4. Dichloromethane solution ( $1.0 \times 10^{-5}$  M) of complex **3**. Left: under natural light; right: with 306 nm (UV) passing through solution. Complexes **1** and **2** exhibited similar behavior.

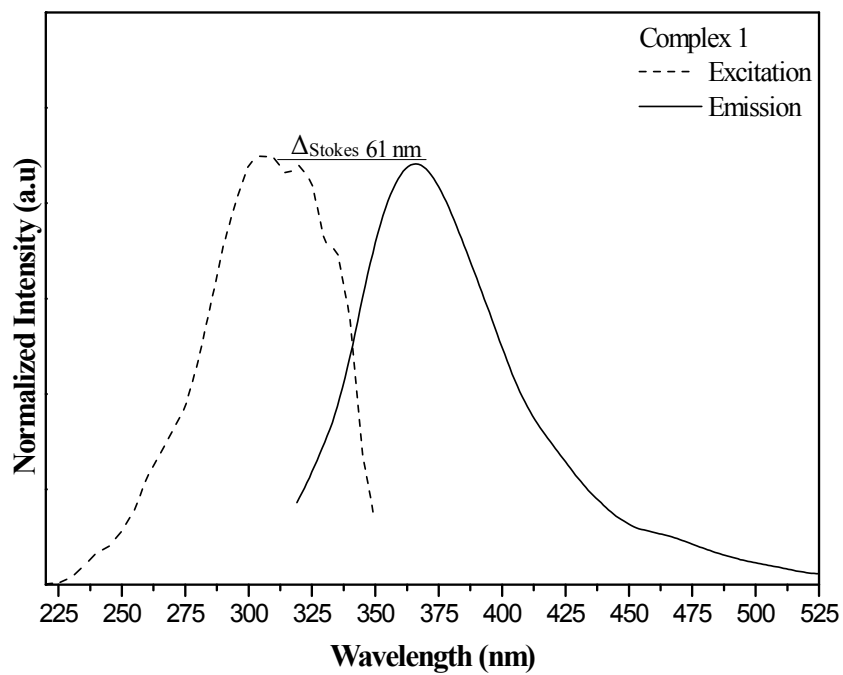

Figure S5. Excitation and emission spectra of complex **1** measured in  $\text{CH}_2\text{Cl}_2$  solution ( $\approx 1.0 \times 10^{-5} \text{ M}$ ) at 298 K ( $\lambda_{\text{ex}} = 305 \text{ nm}$ ).

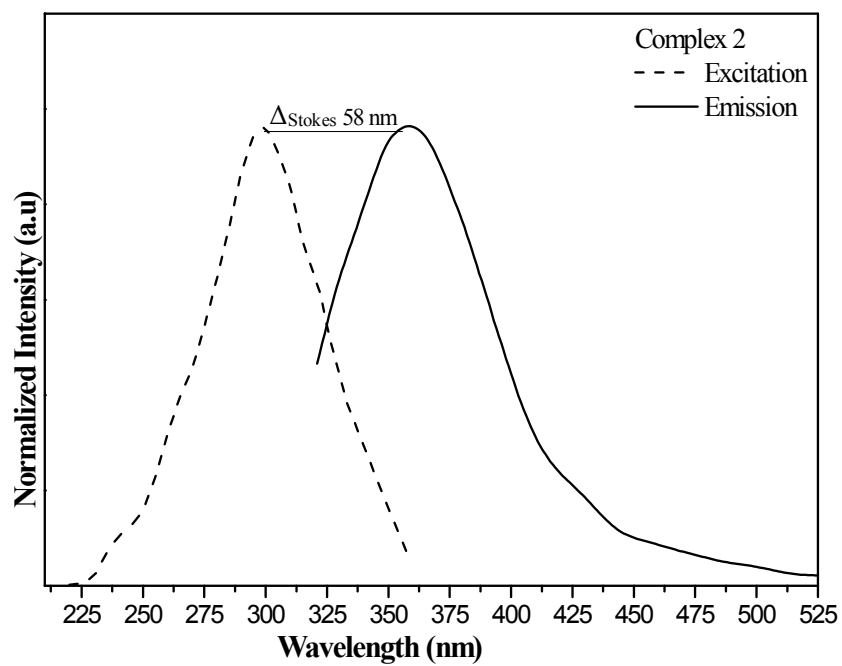

Figure S6. Excitation and emission spectra of complex **2** measured in  $\text{CH}_2\text{Cl}_2$  solution ( $\approx 1.0 \times 10^{-5} \text{ M}$ ) at 298 K ( $\lambda_{\text{ex}} = 300 \text{ nm}$ ).

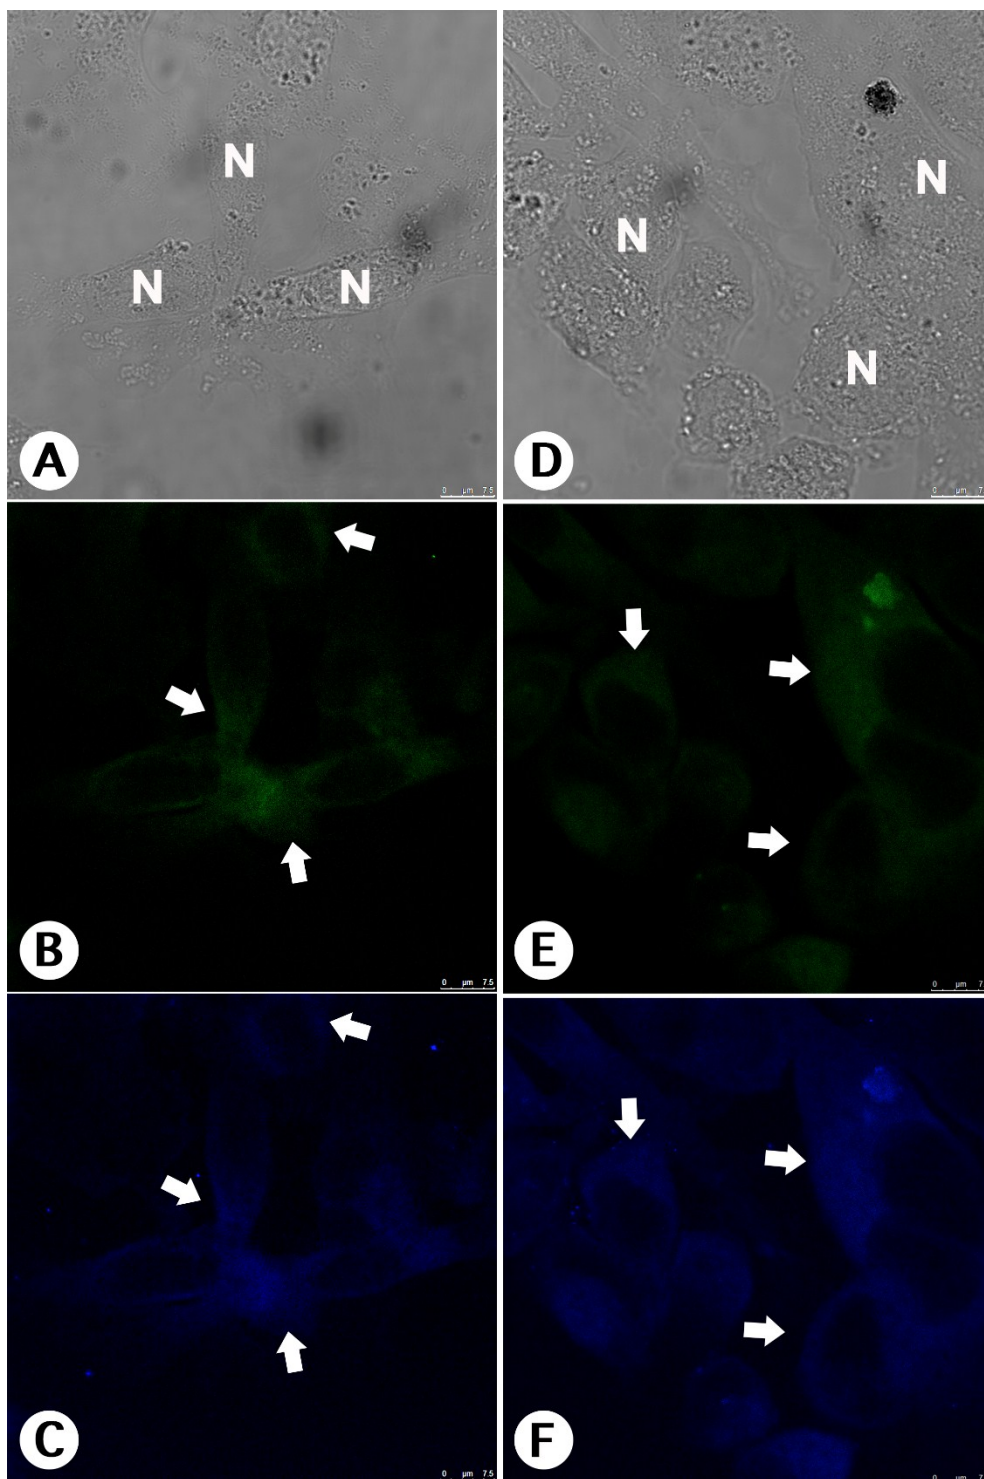

Figure S7. Confocal fluorescence microscopy images of MCF-7 cells stained with **1**. Images A, B and C live cells, images D, E and F fixed cells. The complex **1** has dual fluorescence emission, green ( $\lambda_{\text{exc}} = 405 \text{ nm}$ ) shown in images B and E and blue ( $\lambda_{\text{exc}} = 305 \text{ nm}$ ) shown in images C and F. The fluorescence was distributed into the cells' cytoplasm (white arrow). The cells' nuclei were not stained by this compound, which are shown as black voids in the cells. Images A and D show the normal cells' morphology by phase contrast microscopy. Reference scale bar =  $75 \mu\text{m}$ .



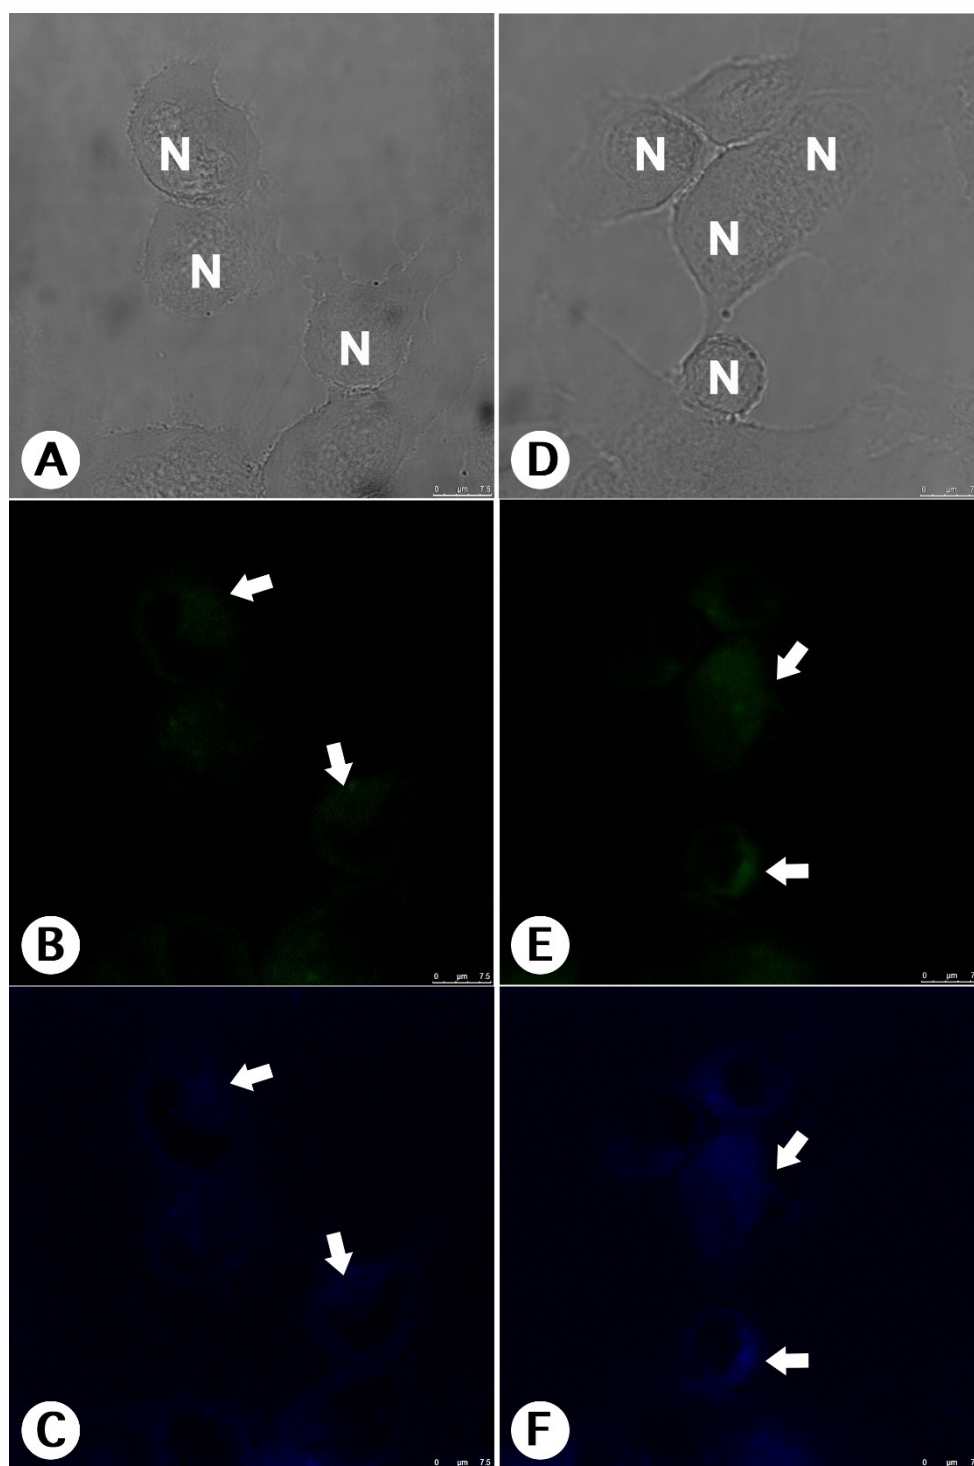

Figure S8. Confocal fluorescence microscopy images of MCF-7 cells stained with **2**. Images A, B and C live cells, images D, E and F fixed cells. The complex **2** presented dual fluorescence emission, green ( $\lambda_{exc} = 405 \text{ nm}$ ) showed in images B and E and blue ( $\lambda_{exc} = 305 \text{ nm}$ ) showed in images C and F. The fluorescence was distributed into the cells cytoplasm (white arrow). The fluorescent signal was less intense to those observed in cell stained with **2**. The cells nuclei were not stained by this compound, which are showed as black voids in the cells. Images A and D show the normal cells morphology by phase contrast microscopy. Reference scale bar =  $75 \mu\text{m}$ .

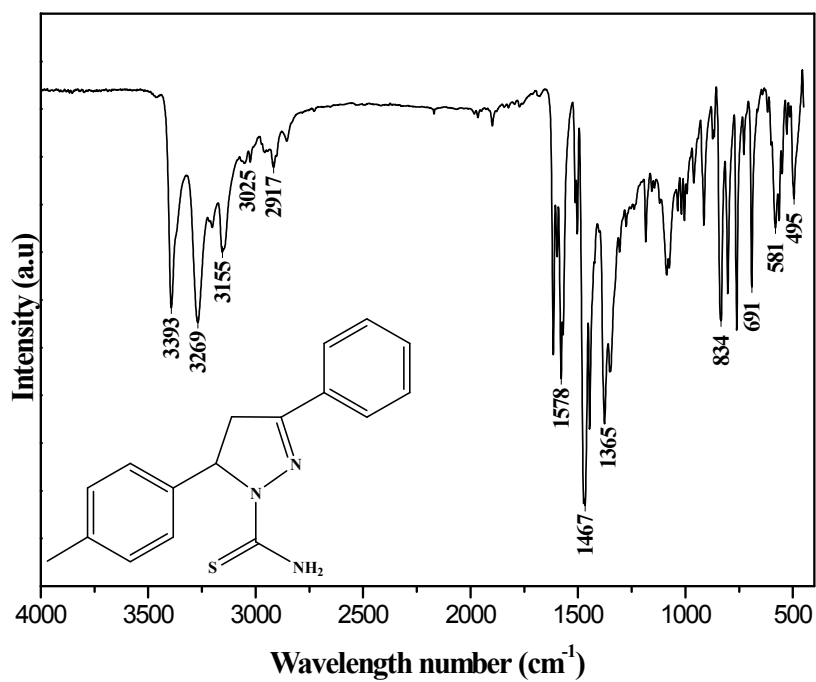

Figure S9. Infrared spectrum of ligand 1.

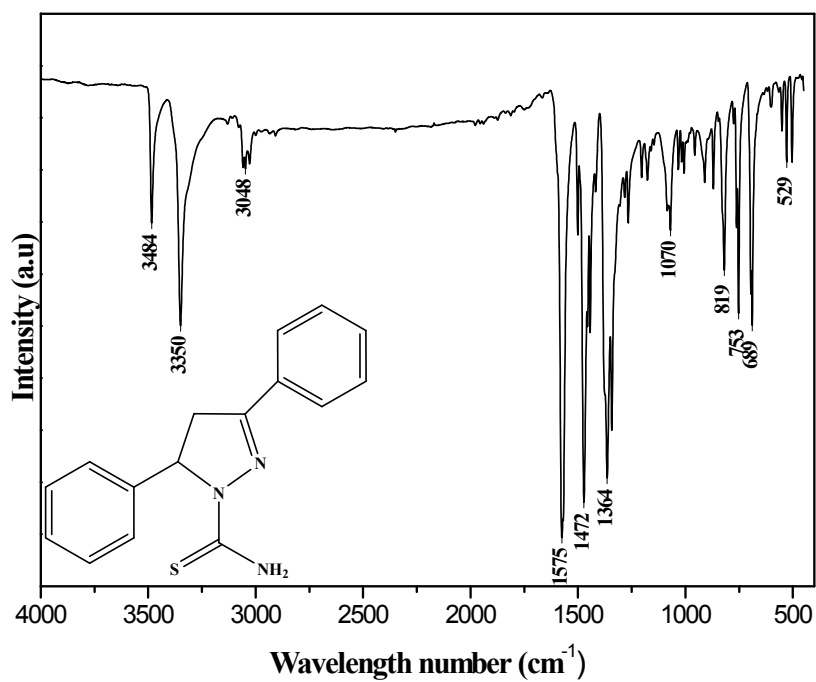

Figure S10. Infrared spectrum of ligand 2.

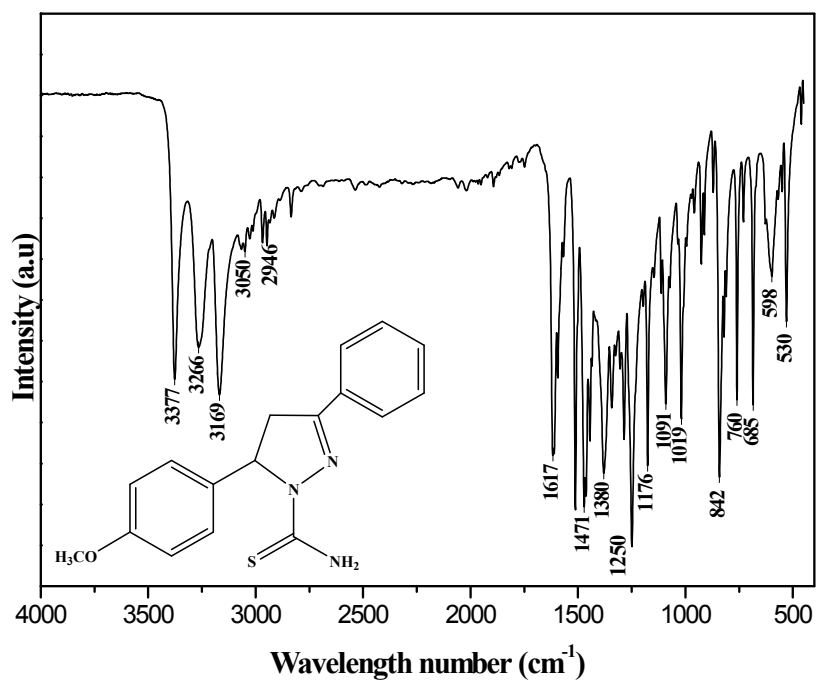

Figure S11. Infrared spectrum of ligand 3.

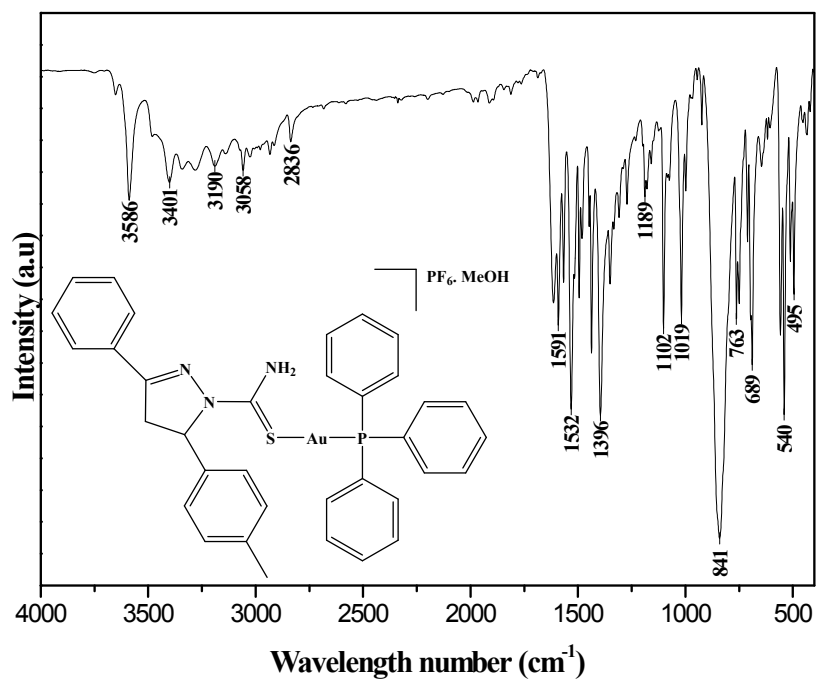

Figure S12. Infrared spectrum of complex 1.

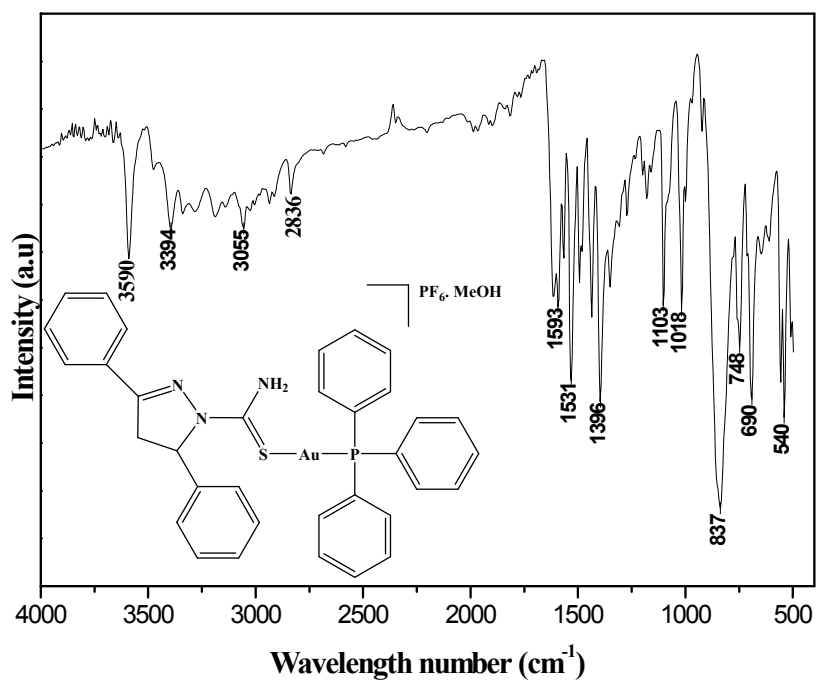

Figure S13. Infrared spectrum of complex 2.

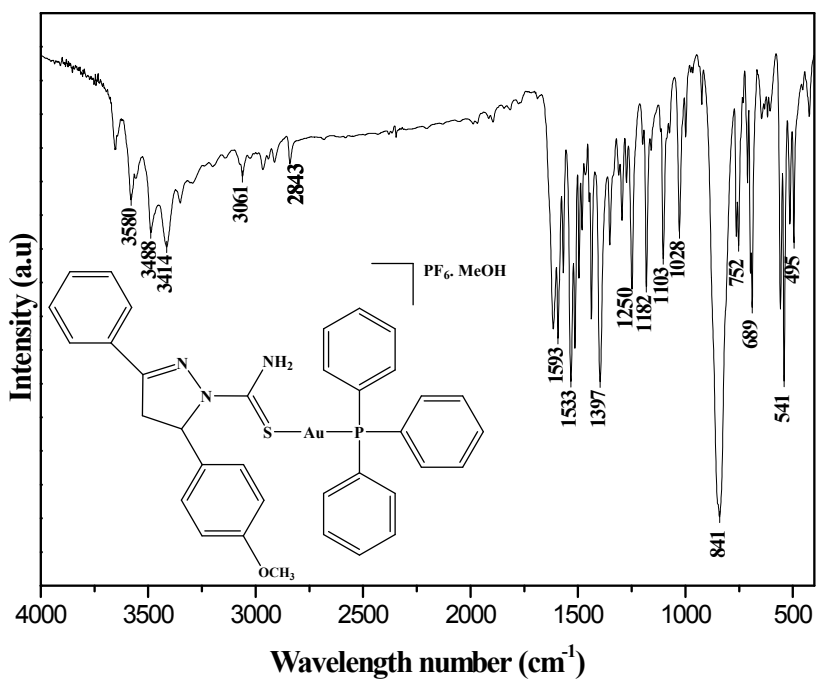

Figure S14. Infrared spectrum of complex 3.

Table S3. Modes and vibrational frequencies of the precursor, ligands and complexes.

|                                  | Vibrational frequency (cm <sup>-1</sup> ) |           |           |           |           |           |           |
|----------------------------------|-------------------------------------------|-----------|-----------|-----------|-----------|-----------|-----------|
|                                  | [Ph <sub>3</sub> PAuCl]                   | Ligand    | Ligand    | Ligand    | Complex   | Complex   | Complex   |
|                                  |                                           | 1         | 2         | 3         | 1         | 2         | 3         |
| $\nu(\text{N-H})$                | –                                         | 3393-3155 | 3484-3350 | 3337-3169 | 3586-3190 | 3580-3414 | 3580-3414 |
| $\nu(\text{C-H})_{\text{Ar}}$    | 3062                                      | 3025      | 3048      | 3050      | 3058      | 3055      | 3061      |
| $\nu(\text{C-H})$                | –                                         | 2917      | NO        | 2956      | 2836      | 2836      | 2843      |
| $\nu(\text{C=C})_{\text{Ar}}$    | 1480-1384                                 | 1467      | 1472      | 1471      | 1532      | 1531      | 1533      |
| $\nu(\text{C=N})$                | –                                         | 1578      | 1575      | 1617      | 1591      | 1593      | 1593      |
| $\nu(\text{C=S})$                | –                                         | 1365      | 1364      | 1380      | 1396      | 1396      | 1397      |
| $\delta(\text{C-H})$             | 990-750                                   | 990-750   | 990-750   | 990-750   | 990-760   | 990-760   | 990-760   |
| $\nu(\text{P-F})$                | –                                         | –         | –         | –         | 841       | 837       | 841       |
| $\nu(\text{C-P})$                | 1098                                      | –         | –         | –         | 1102      | 1103      | 1103      |
| $\delta(\text{C-H})_{\text{Ar}}$ | 748                                       | 691       | 689       | 685       | 689       | 690       | 689       |
| $\nu(\text{C-O-CH}_3)$           | –                                         | –         | –         | 1250      | –         | –         | 1250      |
| $\nu(\text{O-H})$                | –                                         | –         | –         | –         | 3586      | 3590      | 3580      |

NO: not observed.

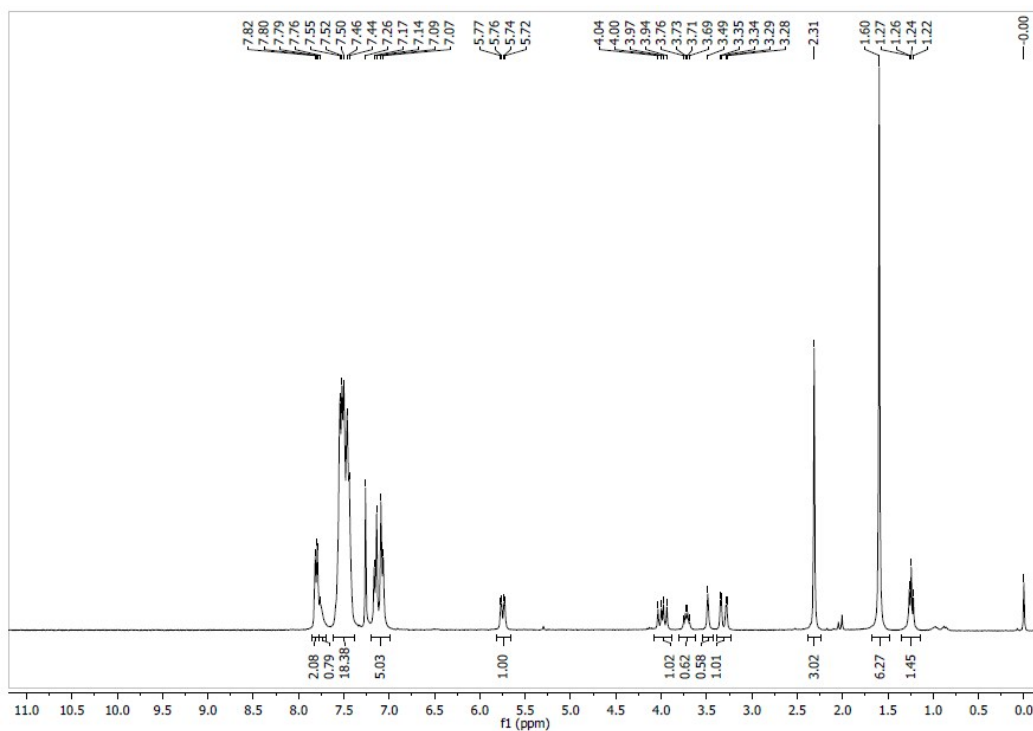

Complex **1**.  $^1\text{H}$  NMR (300 MHz,  $\text{CDCl}_3$ )  $\delta$  7.82-7.79 (m, 2H, Ar), 7.76 (bs, 1H, NH), 7.55-7.44 (m, 18H, Ar), 7.26-7.07 (m, 5H, Ar + NH), 5.75 (dd,  $J = 11.0, 3.5$  Hz, 1H), 3.99 (dd,  $J = 18.0, 11.0$  Hz, 1H), 3.31 (dd,  $J = 18.0, 3.6$  Hz, 1H). 2.31 (s, 3H,  $\text{CH}_3$ ).

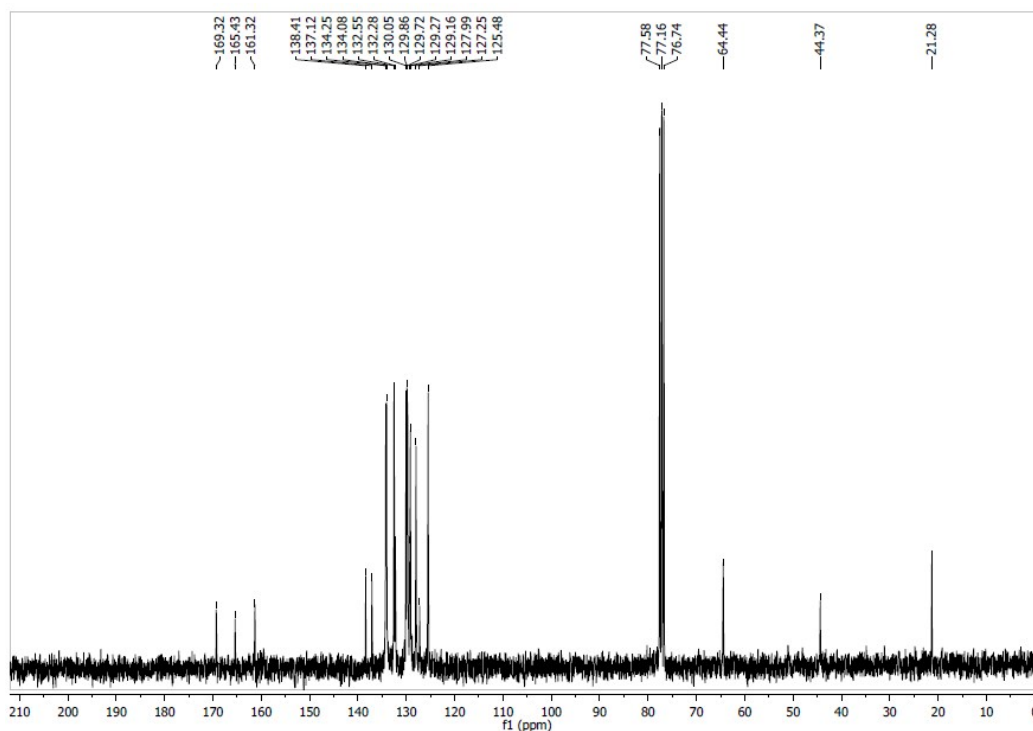

Complex **1**.  $^{13}\text{C}$  NMR (75 MHz,  $\text{CDCl}_3$ )  $\delta$  169.3, 165.4, 161.3, 137.7 (d,  $\text{JC-P} = 96.8$  Hz), 134.2 (d,  $\text{JC-P} = 12.9$  Hz), 132.6, 132.3, 130.0, 130.0 (d,  $\text{JC-P} = 13.9$  Hz), 129.3, 129.2, 128.0, 127.2, 125.5,

64.4, 44.4, 21.3.

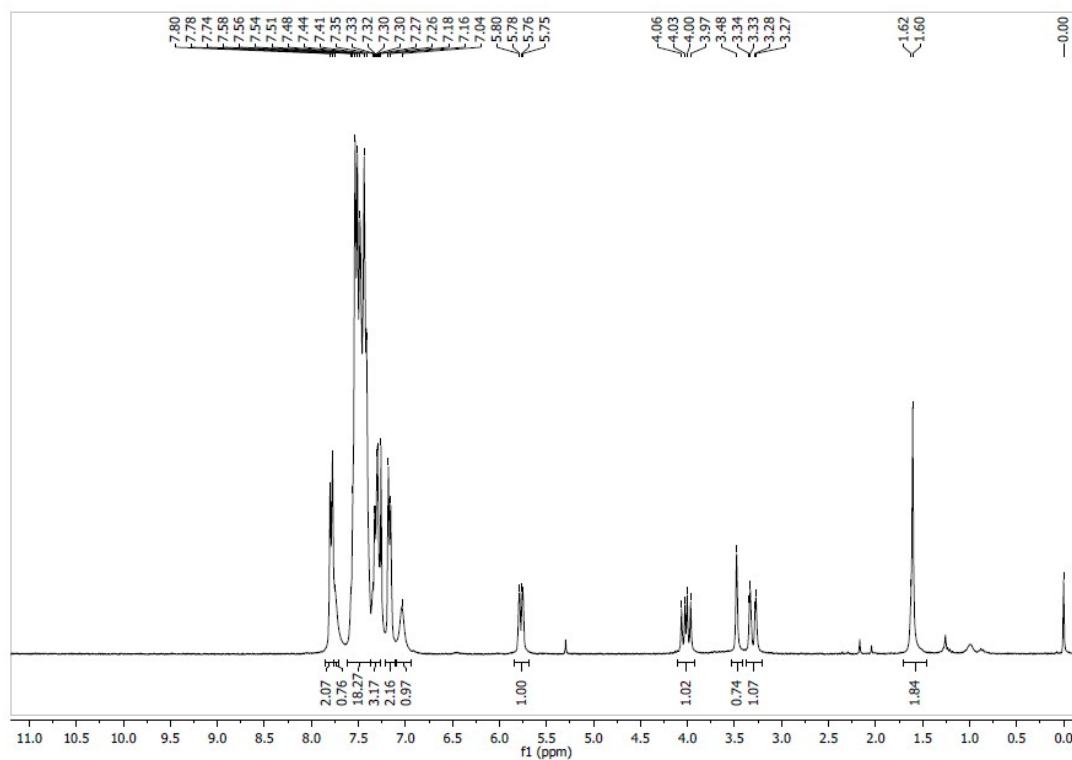

Complex 2.  $^1\text{H}$  NMR (300 MHz,  $\text{CDCl}_3$ )  $\delta$  7.80-7.78 (m, 2H, Ar), 7.74 (bs, 1H, NH), 7.58-7.41 (m, 18H, Ar), 7.35-7.26 (m, 3H, Ar), 7.18-7.16 (m, 2H, Ar), 7.04 (bs, 1H, NH), 5.77 (dd,  $J = 11.0, 3.6$  Hz), 4.02 (dd,  $J = 18.2, 11.0$  Hz), 3.31 (dd,  $J = 18.1, 3.4$  Hz).

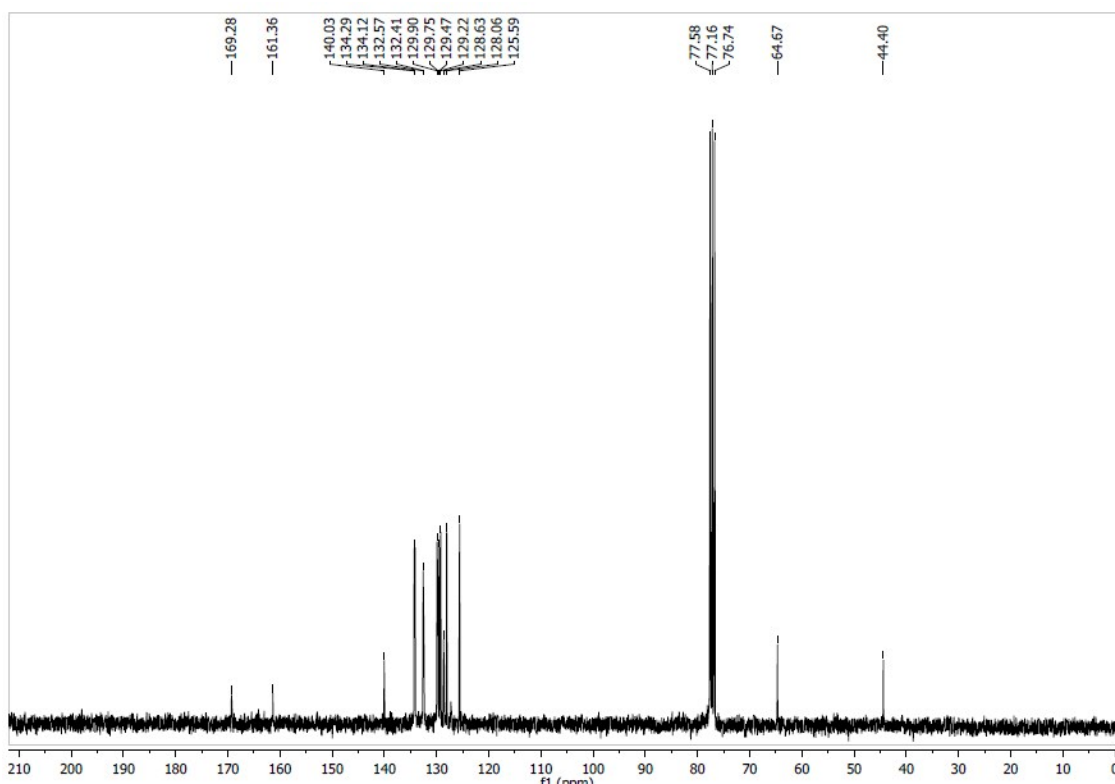

Complex 2.  $^{13}\text{C}$  NMR (75 MHz,  $\text{CDCl}_3$ )  $\delta$  169.3, 161.4, 140.0, 134.3, 134.1, 132.6, 132.4, 129.9, 129.8, 129.5, 129.2, 128.6, 128.1, 125.6, 64.7, 44.4.

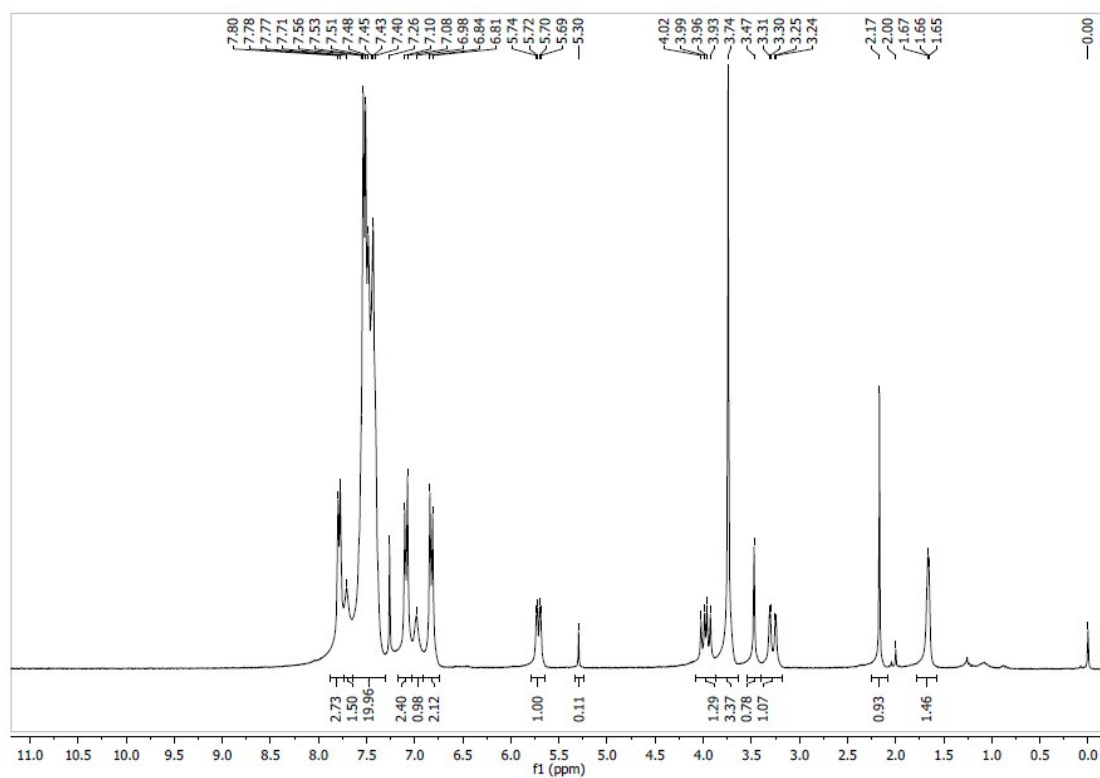

Complex **3**. <sup>1</sup>H NMR (300 MHz, CDCl<sub>3</sub>) δ 7.80-7.77 (m, 2H, Ar), 7.71 (bs, 1H, NH), 7.56-7.40 (m, 18H, Ar), 7.10-7.08 (m, 2H, Ar), 6.98 (bs, 1H, NH), 6.84-6.81 (m, 2H, Ar), 5.71 (dd, J = 11.0, 3.6 Hz, 1H), 3.97 (dd, J = 18.2, 11.0 Hz, 1H), 3.74 (s, 3H, OCH<sub>3</sub>), 3.28 (dd, J = 18.2, 3.6 Hz, 1H).

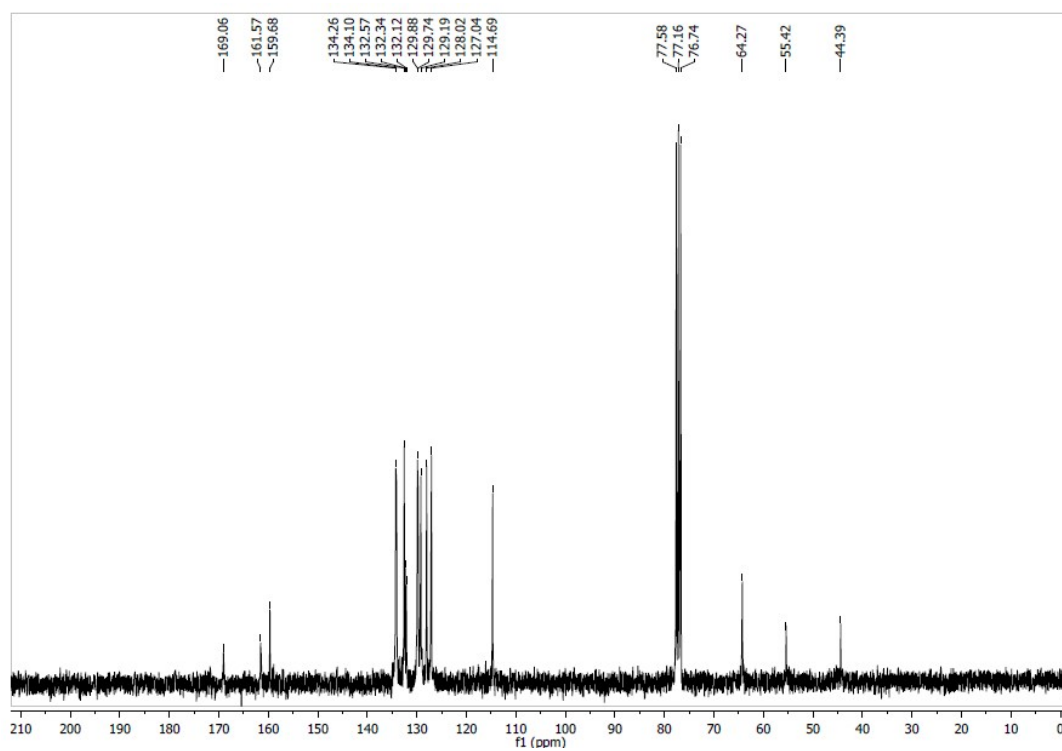



Complex **3**.  $^{13}\text{C}$  NMR (75 MHz,  $\text{CDCl}_3$ )  $\delta$  169.1, 161.6, 159.7, 134.3, 134.1, 132.6, 132.3, 132.1, 129.9, 129.7, 129.2, 128.0, 127.0, 114.7, 64.3, 55.4, 44.4.
